# Supplementary material for: Inv3D: a high-resolution 3D invoice dataset for template-guided single-image document unwarping
Source: Springer Nature journal article supplement (doi:10.1007/s10032-023-00434-x), 2023-04-29
Supplement: MOESM1 [file 25303106]

# Supplementary Material: Inv3D: A High-Resolution 3D Invoice Dataset for Template-Guided Single-Image Document Unwarping

Felix Hertlein<sup>1,2\*</sup>, Alexander Naumann<sup>1,2</sup> and Patrick Philipp<sup>1</sup>

<sup>1</sup>FZI Research Center for Information Technology, Haid-und-Neu-Str. 10–14, Karlsruhe, 76131, Baden-Württemberg, Germany.

<sup>2</sup>KIT Karlsruhe Institute of Technology, Kaiserstraße 12, Karlsruhe, 76131, Baden-Württemberg, Germany.

\*Corresponding author(s). E-mail(s): [hertlein@fzi.de](mailto:hertlein@fzi.de);  
Contributing authors: [anaumann@fzi.de](mailto:anaumann@fzi.de); [philipp@fzi.de](mailto:philipp@fzi.de);

## Evaluation of state of the art with respect to modifications

Tables 1 and 2 show an in depth inspection of DewarpNet (w/o refinement network) [Das et al (2019)] and GeoTr [Feng et al (2021)] on the Inv3DReal benchmark split by the modification type. Both networks were trained on our proposed Inv3D dataset.

Both approaches agree upon *perspective* and *curled* deformation, as well as the *bright* setting as the easiest modifications. Similar to our model GeoTrTemplateLarge, the metric local distortion (LD) yields best values with crumples and *shadow*.

## References

- Das S, Ma K, Shu Z, et al (2019) Dewarpnet: Single-image document unwarping with stacked 3d and 2d regression networks. In: Proceedings of the IEEE/CVF International Conference on Computer Vision, pp 131–140
- Feng H, Wang Y, Zhou W, et al (2021) Doctr: Document image transformer for geometric unwarping and illumination correction. In: Proceedings of the 29th ACM International Conference on Multimedia, pp 273–281

| Modification  | ↑MS-SSIM           | ↓LD                  | ↓LPIPS             | ↓ED              | ↓CER               |
|---------------|--------------------|----------------------|--------------------|------------------|--------------------|
| perspective   | <b>0.61 (0.10)</b> | 29.23 (11.52)        | <b>0.37 (0.12)</b> | 357 (185)        | 0.56 (0.27)        |
| curled        | 0.60 (0.09)        | 29.18 (10.77)        | 0.38 (0.10)        | <b>344 (154)</b> | <b>0.54 (0.22)</b> |
| fewfold       | 0.58 (0.10)        | 26.46 ( 9.51)        | 0.40 (0.11)        | 377 (191)        | 0.58 (0.26)        |
| multifold     | 0.53 (0.09)        | 25.87 ( 9.33)        | 0.44 (0.11)        | 404 (167)        | 0.62 (0.21)        |
| crumples easy | 0.55 (0.11)        | 21.51 ( 7.75)        | 0.41 (0.11)        | 377 (177)        | 0.59 (0.27)        |
| crumples hard | 0.45 (0.09)        | <b>19.76 (10.68)</b> | 0.55 (0.10)        | 462 (163)        | 0.71 (0.17)        |
| bright        | <b>0.60 (0.11)</b> | 24.70 ( 9.80)        | <b>0.35 (0.10)</b> | <b>324 (170)</b> | <b>0.50 (0.23)</b> |
| color         | 0.57 (0.09)        | 29.15 (11.04)        | 0.48 (0.13)        | 369 (184)        | 0.57 (0.25)        |
| shadow        | 0.48 (0.09)        | <b>22.16 ( 9.67)</b> | 0.44 (0.09)        | 468 (140)        | 0.73 (0.18)        |

**Table 1:** Detailed evaluation of DewarpNet (w/o refinement network) [Das et al (2019)] on our new benchmark Inv3DReal split by modification category. Values in brackets denote standard deviations.

| Modification  | ↑MS-SSIM           | ↓LD                  | ↓LPIPS             | ↓ED              | ↓CER               |
|---------------|--------------------|----------------------|--------------------|------------------|--------------------|
| perspective   | <b>0.61 (0.10)</b> | 26.64 (10.57)        | <b>0.36 (0.12)</b> | 342 (192)        | 0.53 (0.27)        |
| curled        | 0.60 (0.09)        | 23.69 ( 9.67)        | <b>0.36 (0.10)</b> | <b>318 (156)</b> | <b>0.50 (0.23)</b> |
| fewfold       | 0.58 (0.10)        | 24.32 ( 9.72)        | 0.38 (0.11)        | 372 (203)        | 0.57 (0.26)        |
| multifold     | 0.53 (0.10)        | 24.32 (11.13)        | 0.43 (0.11)        | 363 (161)        | 0.56 (0.21)        |
| crumples easy | 0.56 (0.10)        | <b>18.88 ( 7.54)</b> | 0.39 (0.10)        | 360 (196)        | 0.57 (0.30)        |
| crumples hard | 0.46 (0.09)        | 19.03 ( 8.63)        | 0.53 (0.10)        | 434 (158)        | 0.67 (0.18)        |
| bright        | <b>0.60 (0.11)</b> | 21.81 (10.27)        | <b>0.34 (0.10)</b> | <b>297 (180)</b> | <b>0.46 (0.24)</b> |
| color         | 0.58 (0.09)        | 26.18 ( 9.81)        | 0.46 (0.13)        | 345 (180)        | 0.53 (0.25)        |
| shadow        | 0.49 (0.09)        | <b>20.45 ( 8.98)</b> | 0.42 (0.10)        | 453 (145)        | 0.70 (0.19)        |

**Table 2:** Detailed evaluation of GeoTr [Feng et al (2021)] on our new benchmark Inv3DReal split by modification category. Values in brackets denote standard deviations.
